# Supplementary material
Source: HighWire-hosted journal article supplement (https://bibliotheek.ehb.be:2668/highwire/filestream/160712/field_highwire_adjunct_files/0/ip-2023-044986supp001_data_supplement.pdf)
Supplement: ip-2023-044986supp001_data_supplement.pdf [file ip-2023-044986supp001_data_supplement.pdf]

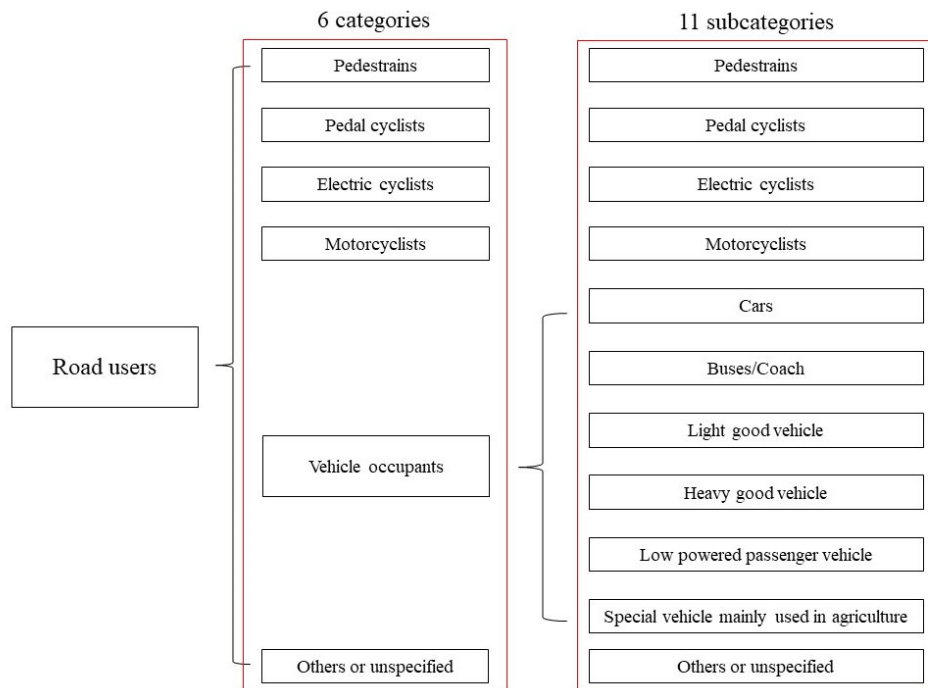**Appendix Figure 1**

Road user classification according to the ICD-11

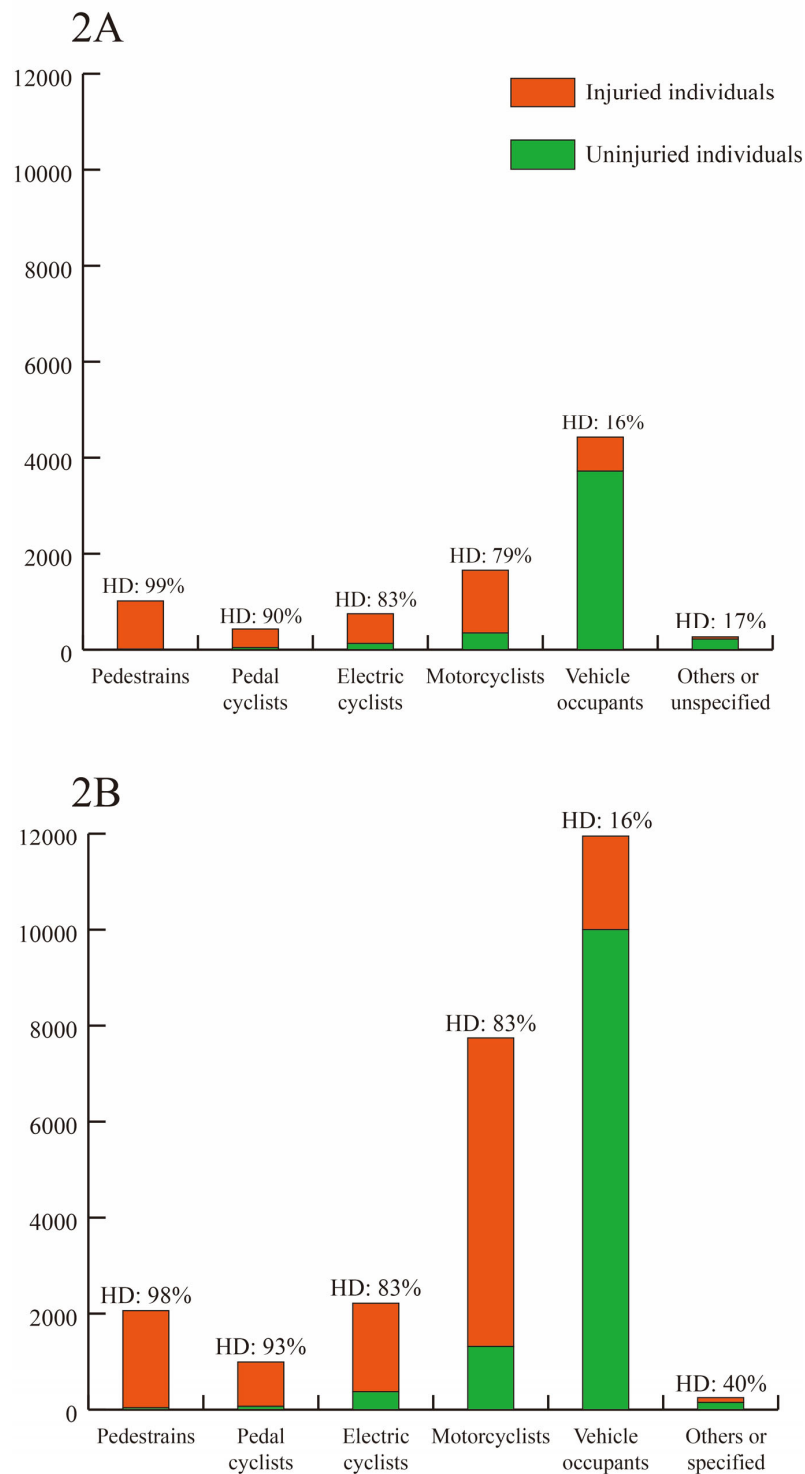

### Appendix Figure 2

Distribution of road traffic injuries by type of road user in Guangzhou: Migrant workers vs. the control group; 2A: Control group; 2B: Migrant workers

Note: HD: human damage, which represents road traffic injuries/individuals involved in road traffic crashes (including uninjured and injured individuals).

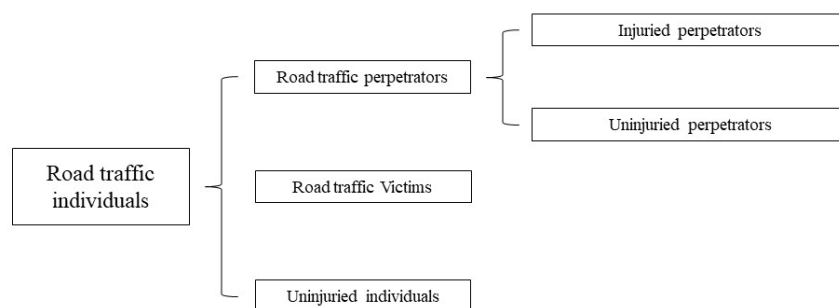**Appendix Figure 3**

Classification of individuals involved in road traffic crashes (according to the determination of responsibility and injury)
